# Supplementary material
Source: PubMed Central journal article supplement (PMC1895952)
Supplement: pnas_0701883104_7.pdf [file pnas_0701883104_7.pdf]

**a***M. musculus**R. norvegicus**H. sapiens**M. musculus***Som**

2/2

**Mit**

3/3

**Meiotic 49/42**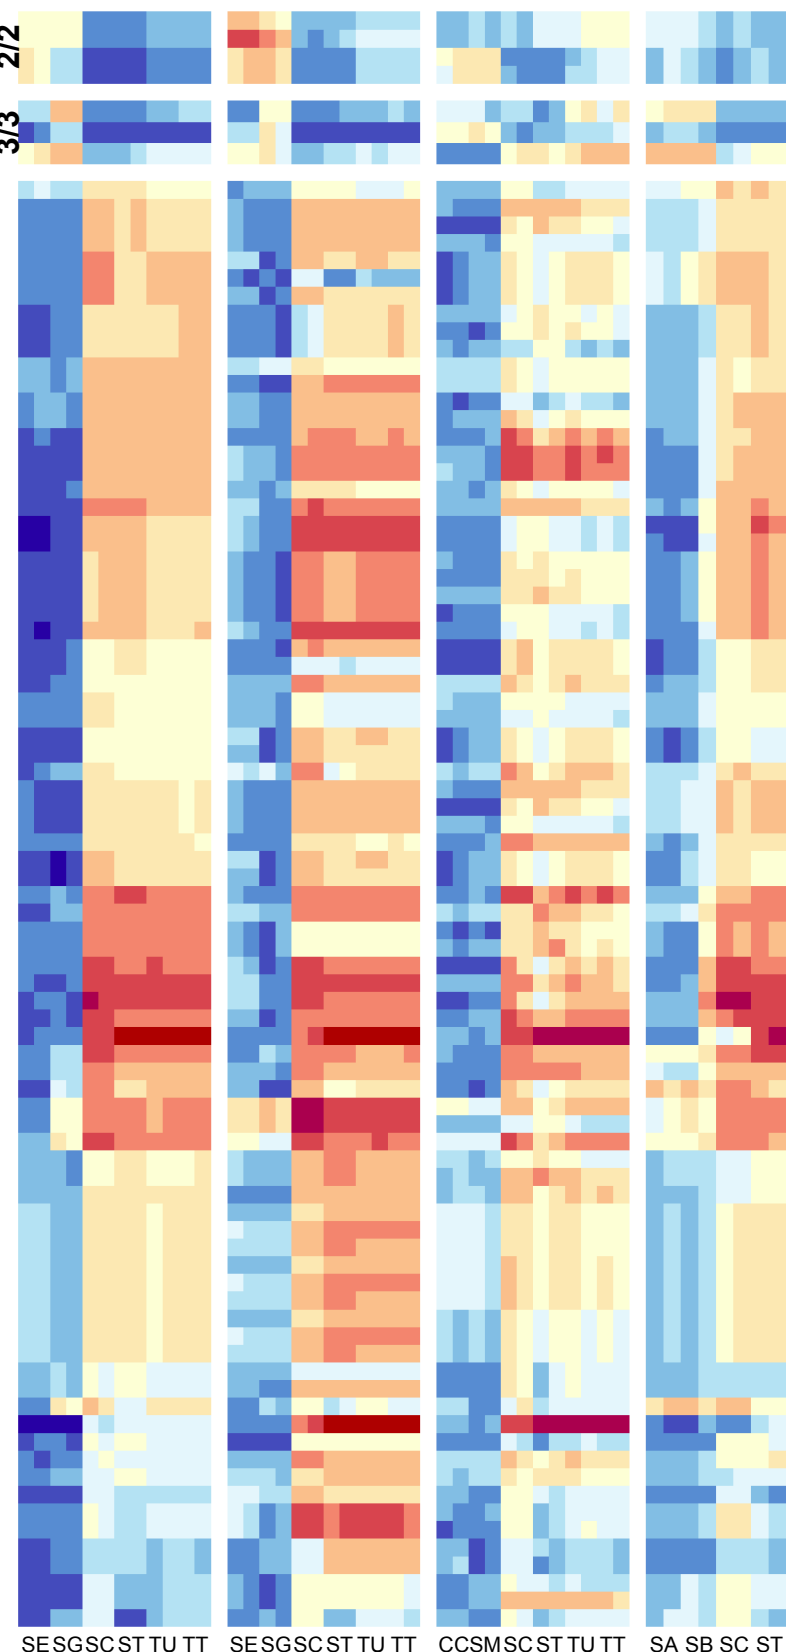

- Gata4 ( 1418864\_at )
- Gata4 ( 1418864\_at )
- Abca1 ( 1450392\_at )
- Abca1 ( 1450392\_at )
- Osr2 ( 1426155\_a\_at )
- Pcdh18 ( 1422890\_at )
- Dmrt1 ( 1423582\_at )
- 4632434I1Rik ( 1434240\_at )
- Gprk2l ( 1420355\_at )
- Gprk2l ( 1420355\_at )
- Gprk2l ( 1420355\_at )
- Spdy1 ( 1429470\_at )
- Spdy1 ( 1429470\_at )
- Spdy1 ( 1429470\_at )
- 3300001K11Rik ( 1429355\_at )
- 3300001K11Rik ( 1429355\_at )
- 3300001K11Rik ( 1429355\_at )
- D930005D10Rik ( 1456915\_at )
- D930005D10Rik ( 1456915\_at )
- D930005D10Rik ( 1456915\_at )
- 4933417K04Rik ( 1451578\_at )
- 4933417K04Rik ( 1451578\_at )
- 4933417K04Rik ( 1451578\_at )
- Ccna1 ( 1449177\_at )
- Acrbp ( 1422874\_at )
- Acrbp ( 1422874\_at )
- Adam18 ( 1419726\_at )
- 4921513E08Rik ( 1419306\_at )
- Cage1 ( 1456224\_x\_at )
- Cage1 ( 1434810\_a\_at )
- Als2cr11 ( 1437659\_at )
- Cage1 ( 1434811\_at )
- 4930550C14Rik ( 1429824\_at )
- 4930550C14Rik ( 1429824\_at )
- 4930550C14Rik ( 1429824\_at )
- 4930451G09Rik ( 1441173\_at )
- Nmnat3 ( 1432342\_at )
- Nmnat3 ( 1432342\_at )
- Spdy1 ( 1441390\_at )
- Spdy1 ( 1441390\_at )
- Aurkc ( 1449364\_at )
- Gprk2l ( 1454152\_a\_at )
- Gprk2l ( 1454152\_a\_at )
- Gprk2l ( 1454152\_a\_at )
- 2700059L22Rik ( 1429936\_at )
- Spdy1 ( 1432135\_s\_at )
- Spdy1 ( 1432135\_s\_at )
- Zppb ( 1450751\_at )
- Gsto2 ( 1453708\_a\_at )
- Rnf190 ( 1456171\_at )
- Rnf190 ( 1456171\_at )
- Adam2 ( 1460374\_at )
- 9630025C22 ( 1455947\_at )
- Ldhal6b ( 1434247\_at )
- Ppp3r2 ( 1437535\_at )
- Tnp1 ( 1415924\_at )
- Dmrtb1 ( 1427252\_at )
- Ypel1 ( 1431782\_s\_at )
- 4930518F03Rik ( 1444122\_at )
- Nasp ( 1416043\_at )
- Nasp ( 1416043\_at )
- Tcf5 ( 1456515\_s\_at )
- Lrrc27 ( 1431217\_at )
- Lrrc27 ( 1431217\_at )
- Ribc2 ( 1432086\_a\_at )
- Pla2g6 ( 1431278\_s\_at )
- Tsga10 ( 1447283\_at )
- Tsga10 ( 1447283\_at )
- A530057A03Rik ( 1456208\_at )
- Tnp1 ( 1438632\_x\_at )
- Als2cr15 ( 1431049\_at )
- 4930451G09Rik ( 1453594\_at )
- Hexim2 ( 1429025\_a\_at )
- Irak1bp1 ( 1422683\_at )
- 4930524B15Rik ( 1421576\_at )
- 4930524B15Rik ( 1421576\_at )
- Igf2bp3 ( 1450687\_at )
- Igf2bp3 ( 1450687\_at )
- 4932413O14Rik ( 1442273\_at )
- 4932413O14Rik ( 1442273\_at )
- Kbtbd8 ( 1441275\_at )

- COC
- Ovary
- Placenta
- Retina
- Eye
- Brain
- Aorta
- Heart
- Lung
- Kidney
- Liver
- Spleen
- Submax gland
- Thymus
- Stomach
- Lymph node
- Skeletal muscle
- CD4+ naive
- Embryo day 7

SE SG SC ST TU TT

SE SG SC ST TU TT

CCS MSC ST TU TT

SA SB SC ST
