# Supplementary material
Source: PubMed Central journal article supplement (PMC1895952)
Supplement: pnas_0701883104_11.pdf [file pnas_0701883104_11.pdf]

**Table 1**

| <i>Human Cell Type</i>                         | <i>Sample name</i>        | <i>Isolation Procedure</i>                                    | <i>Purity (%)</i>          | <i>Main Contaminants</i>                                      | <i>Reference</i> |
|------------------------------------------------|---------------------------|---------------------------------------------------------------|----------------------------|---------------------------------------------------------------|------------------|
| Pachytene Spermatocytes                        | HSC                       | Sequential enzymatic digestion and centrifugal elutriation    | 86                         | Round spermatids,                                             | 1                |
| Spermatids                                     | HST                       | Sequential enzymatic digestion and centrifugal elutriation    | 92                         | Sperm heads, spermatocytes                                    | 1                |
| <b><i>Rat Cell Type</i></b>                    |                           |                                                               |                            |                                                               |                  |
| Sertoli cells                                  | RSE                       | Sequential enzymatic digestion                                | 96                         | Peritubular and meiotic germ cells                            | 2                |
| Spermatogonia                                  | RSG                       | Sequential enzymatic digestion and sedimentation unit gravity | 85                         | Sertoli cell fragments, peritubular cells, Leydig cells       | 3                |
| Pachytene Spermatocytes                        | RSC                       | Mechanical dispersion and centrifugal elutriation             | 90                         | Early spermatids                                              | 4                |
| Round Spermatids                               | RST                       | Mechanical dispersion and centrifugal elutriation             | 90                         | Heads of elongated spermatids, residual bodies, spermatocytes | 4                |
| <b><i>Mouse Cell Type</i></b>                  |                           |                                                               |                            |                                                               |                  |
| Sertoli cells                                  | MSE                       | Sequential enzymatic digestion                                | >95                        | Peritubular cells                                             | 5                |
| Spermatogonia                                  | MSG                       | Sequential enzymatic digestion                                | >85                        | Fragments of Sertoli-, peritubular and Leydig cells           | 6                |
| Pachytene Spermatocytes                        | MSC                       | Sequential enzymatic digestion and sedimentation unit gravity | >82.5                      | Leptotene and diplotene spermatocytes                         | 6                |
| Round Spermatids                               | MST                       | Sequential enzymatic digestion and sedimentation unit gravity | 90 – 95                    | Heads of elongated spermatids, spermatid residual bodies      | 6                |
| <b><i>Pooling pattern of human samples</i></b> |                           |                                                               |                            |                                                               |                  |
|                                                | Total Testis (HTT1 and 2) | Tubules (HTU1 and 2)                                          | Spermatocytes (HSC1 and 2) | Spermatids (HST1 and 2)                                       |                  |
| Duplicate 1 (5 Patients)                       | P3, 7, 8 and 9            | P3 and 7                                                      | P1,7 and 8                 | P1, 7 and 8                                                   |                  |
| Duplicate 2 (5 Patients)                       | P4, 5, 6 and 10           | P4 and 6                                                      | P10                        | P2, 6 and 10                                                  |                  |

## References

1. Guillaudeau, T. et al. Expression of HLA class I genes in meiotic and post-meiotic human spermatogenic cells. *Biol Reprod* **55**, 99-110 (1996).
2. Toebosch, A.M., Robertson, D.M., Klaij, I.A., de Jong, F.H. & Grootegoed, J.A. Effects of FSH and testosterone on highly purified rat Sertoli cells: inhibin alpha-subunit mRNA expression and inhibin secretion are enhanced by FSH but not by testosterone. *J Endocrinol* **122**, 757-62 (1989).
3. Com, E., Evrard, B., Roepstorff, P., Aubry, F. & Pineau, C. New insights into the rat spermatogonial proteome: identification of 156 additional proteins. *Mol Cell Proteomics* **2**, 248-61 (2003).
4. Pineau, C., Syed, V., Bardin, C.W., Jegou, B. & Cheng, C.Y. Germ cell-conditioned medium contains multiple factors that modulate the secretion of testins, clusterin, and transferrin by Sertoli cells. *J Androl* **14**, 87-98 (1993).
5. Chung, S.S., Mo, M.Y., Silvestrini, B., Lee, W.M. & Cheng, C.Y. Rat testicular N-cadherin: its complementary deoxyribonucleic acid cloning and regulation. *Endocrinology* **139**, 1853-62 (1998).
6. Wolgemuth, D.J., Gizang-Ginsberg, E., Engelmyer, E., Gavin, B.J. & Ponzetto, C. Separation of mouse testis cells on a Celsep (TM) apparatus and their usefulness as a source of high molecular weight DNA or RNA. *Gamete Res* **12**, 1-10 (1985).
