# Supplementary material
Source: PubMed Central journal article supplement (PMC1895952)
Supplement: pnas_0701883104_12.pdf [file pnas_0701883104_12.pdf]

| Samples                 | Samples GEO ID | Series GEO ID | GeneChips GEO ID |
|-------------------------|----------------|---------------|------------------|
| spermatogonia_A         | GSM95928       | GSE4193       | GPL1261          |
| spermatogonia_A         | GSM95929       | GSE4193       | GPL1261          |
| spermatogonia_B         | GSM95930       | GSE4193       | GPL1261          |
| spermatogonia_B         | GSM95947       | GSE4193       | GPL1261          |
| pachytene_spermatocytes | GSM95948       | GSE4193       | GPL1261          |
| pachytene_spermatocytes | GSM95949       | GSE4193       | GPL1261          |
| round_spermatids        | GSM95950       | GSE4193       | GPL1261          |
| round_spermatids        | GSM95951       | GSE4193       | GPL1261          |
| testis                  | GSM35559       | GSE1986       | GPL1261          |
| cumulus_oocyte_complex  | GSM97169       | GSE4260       | GPL1261          |
| cumulus_oocyte_complex  | GSM97170       | GSE4260       | GPL1261          |
| ovary                   | GSM35553       | GSE1986       | GPL1261          |
| placenta                | GSM35554       | GSE1986       | GPL1261          |
| retina                  |                |               | GPL1261          |
| retina                  |                |               | GPL1261          |
| cornea                  | GSM93716       | GSE4098       | GPL1261          |
| cornea                  | GSM93718       | GSE4098       | GPL1261          |
| cornea                  | GSM93721       | GSE4098       | GPL1261          |
| cornea                  | GSM93723       | GSE4098       | GPL1261          |
| cornea                  | GSM93725       | GSE4098       | GPL1261          |
| cornea                  | GSM93726       | GSE4098       | GPL1261          |
| cornea                  | GSM93730       | GSE4098       | GPL1261          |
| limbus                  | GSM93717       | GSE4098       | GPL1261          |
| limbus                  | GSM93719       | GSE4098       | GPL1261          |
| limbus                  | GSM93720       | GSE4098       | GPL1261          |
| limbus                  | GSM93722       | GSE4098       | GPL1261          |
| limbus                  | GSM93724       | GSE4098       | GPL1261          |
| limbus                  | GSM93727       | GSE4098       | GPL1261          |
| limbus                  | GSM93731       | GSE4098       | GPL1261          |
| eye                     | GSM35547       | GSE1986       | GPL1261          |
| brain                   | GSM35544       | GSE1986       | GPL1261          |
| aorta                   | GSM44663       | GSE2372       | GPL1261          |
| aorta                   | GSM44659       | GSE2372       | GPL1261          |
| aorta                   | GSM44658       | GSE2372       | GPL1261          |
| heart                   | GSM35548       | GSE1986       | GPL1261          |
| heart                   | GSM77688       | GSE3440       | GPL1261          |
| heart                   | GSM77689       | GSE3440       | GPL1261          |
| heart                   | GSM77690       | GSE3440       | GPL1261          |
| heart                   | GSM77691       | GSE3440       | GPL1261          |
| heart                   | GSM77692       | GSE3440       | GPL1261          |
| heart                   | GSM77693       | GSE3440       | GPL1261          |
| lung                    | GSM29706       | C57BL6        | GPL1261          |
| lung                    | GSM29707       | C57BL6        | GPL1261          |
| lung                    | GSM29708       | C57BL6        | GPL1261          |
| lung                    | GSM35551       | GSE1986       | GPL1261          |
| kidney                  | GSM35549       | GSE1986       | GPL1261          |
| liver                   | GSM35550       | GSE1986       | GPL1261          |
| spleen                  | GSM35556       | GSE1986       | GPL1261          |
| submax_gland            | GSM35558       | GSE1986       | GPL1261          |
| thymus                  | GSM35560       | GSE1986       | GPL1261          |
| stomach                 | GSM35557       | GSE1986       | GPL1261          |
| lymph_node              | GSM35552       | GSE1986       | GPL1261          |
| skeletal_muscle         | GSM35555       | GSE1986       | GPL1261          |
| hair_follicles          | GSM46551       | GSE2463       | GPL1261          |
| CD4+_naive              | GSM35545       | GSE1986       | GPL1261          |
| embryo_d7               | GSM35546       | GSE1986       | GPL1261          |
