# Supplementary material
Source: PubMed Central journal article supplement (PMC1895952)

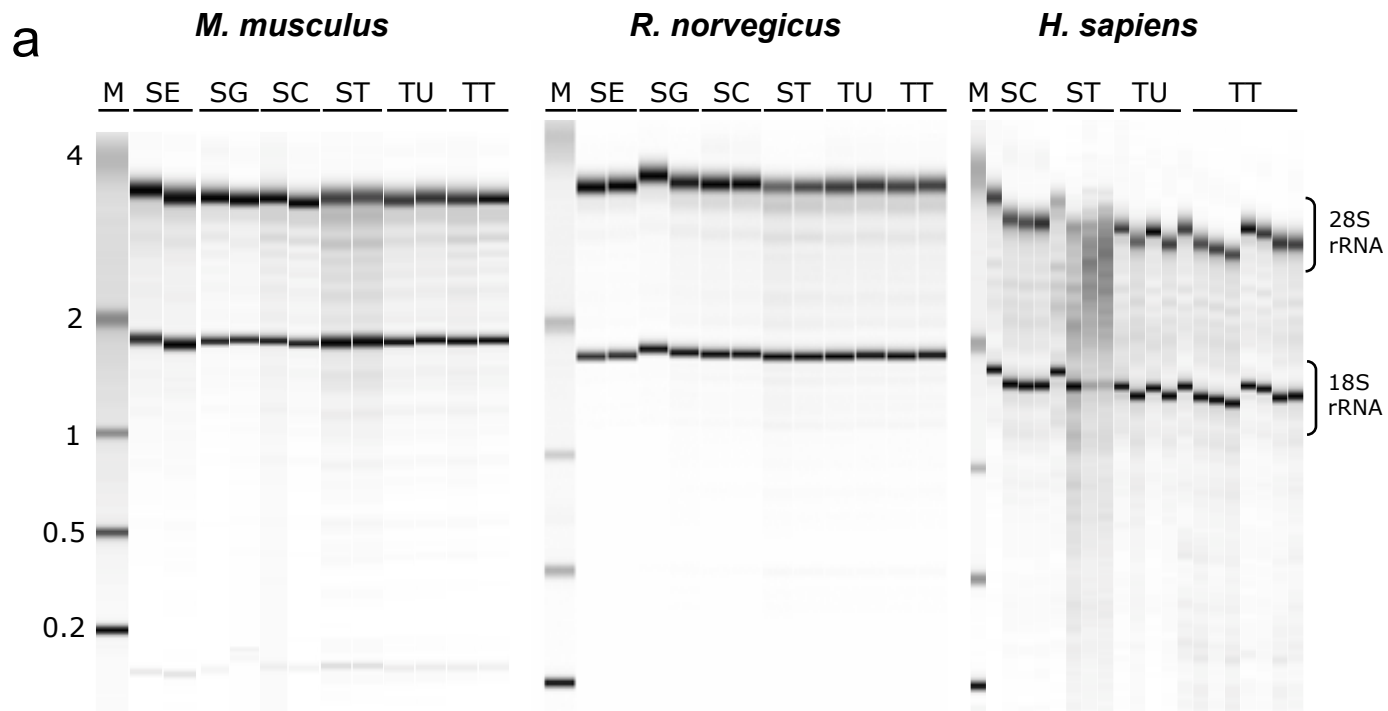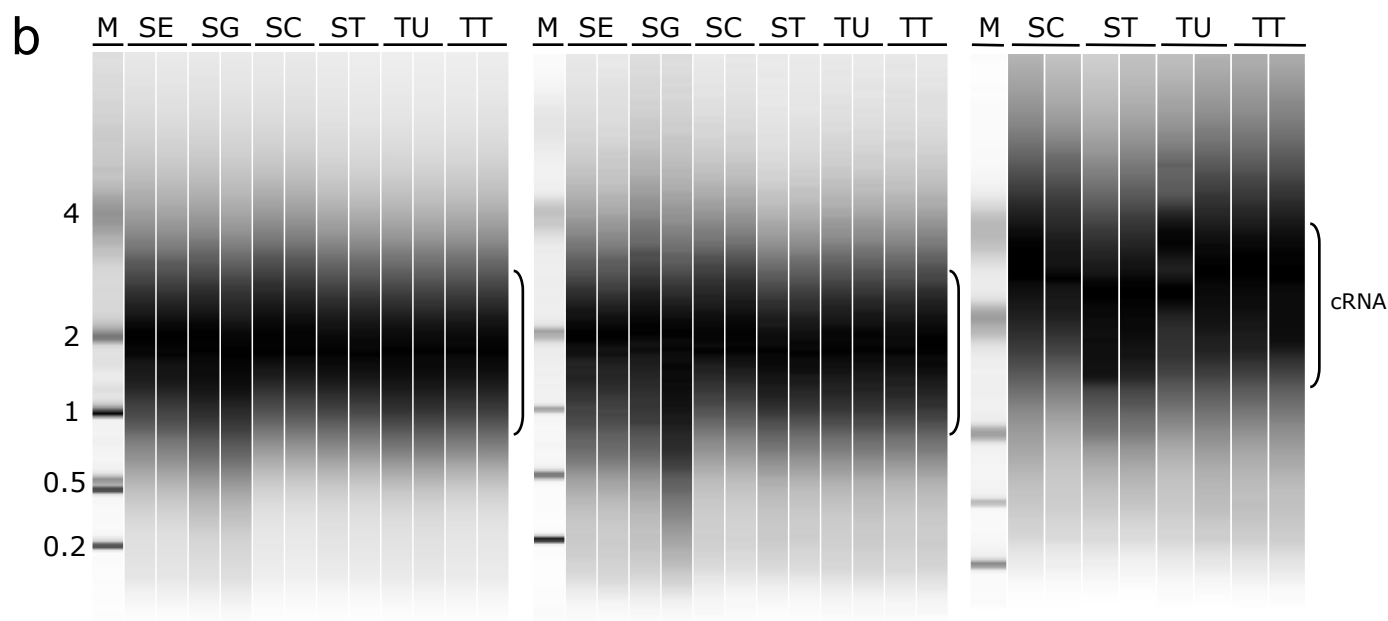

Supplement: pnas_0701883104_1.pdf [file pnas_0701883104_1.pdf]

**Cage1****Nmes1****Mum1**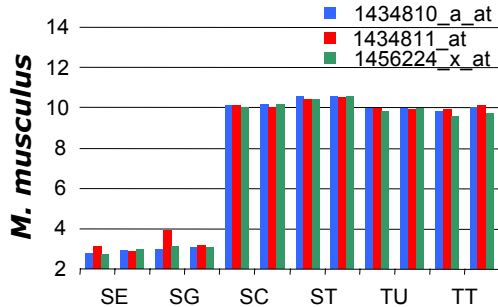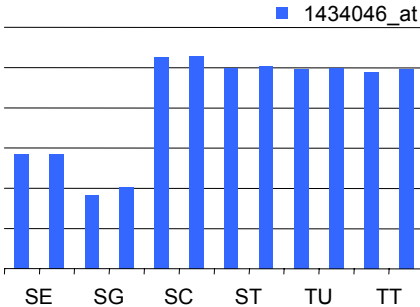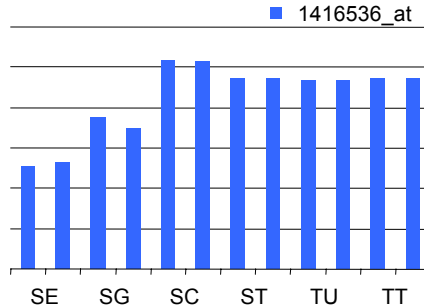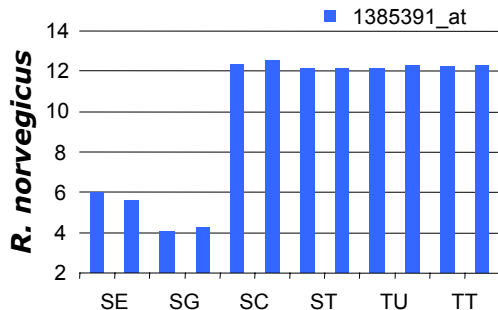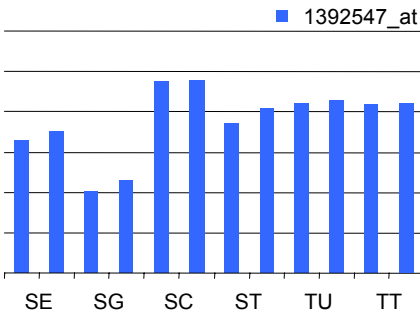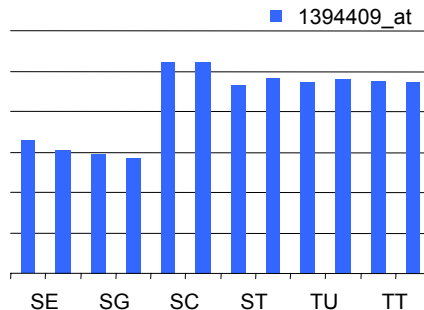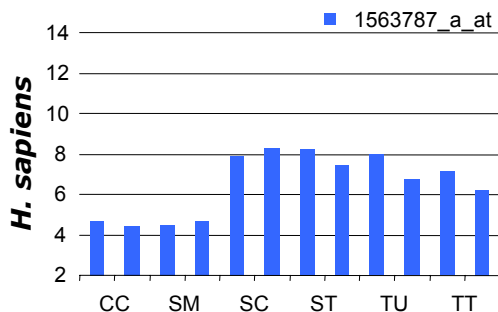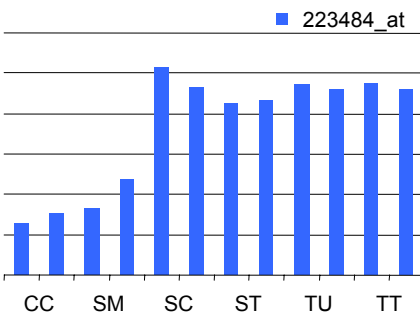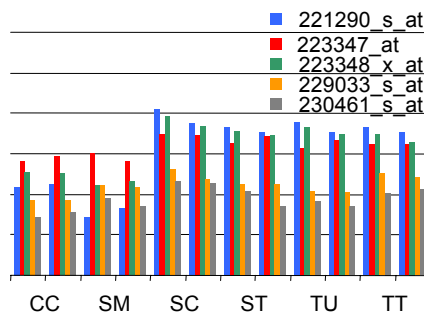

Supplement: pnas_0701883104_10.pdf [file pnas_0701883104_10.pdf]

**C**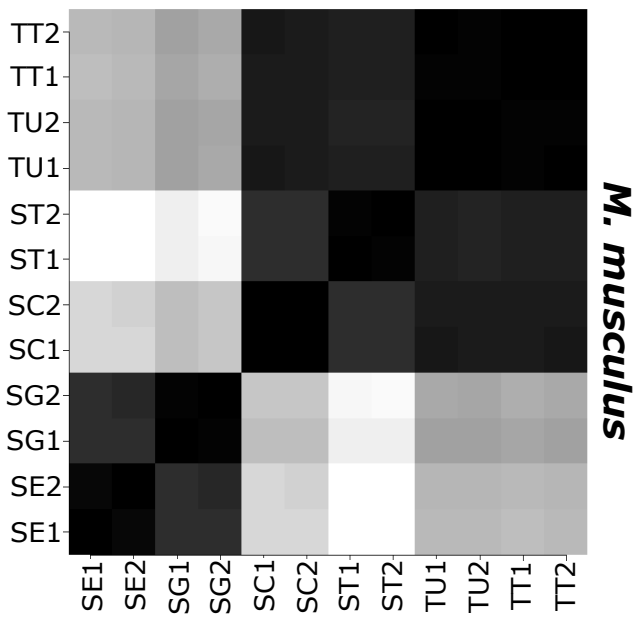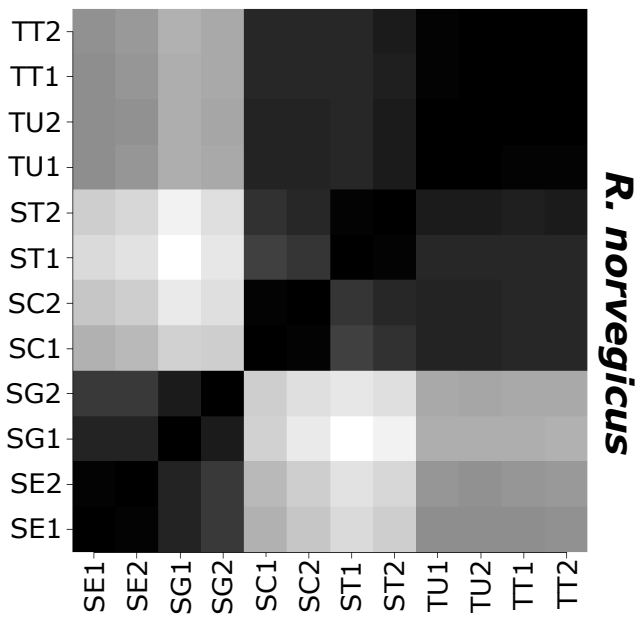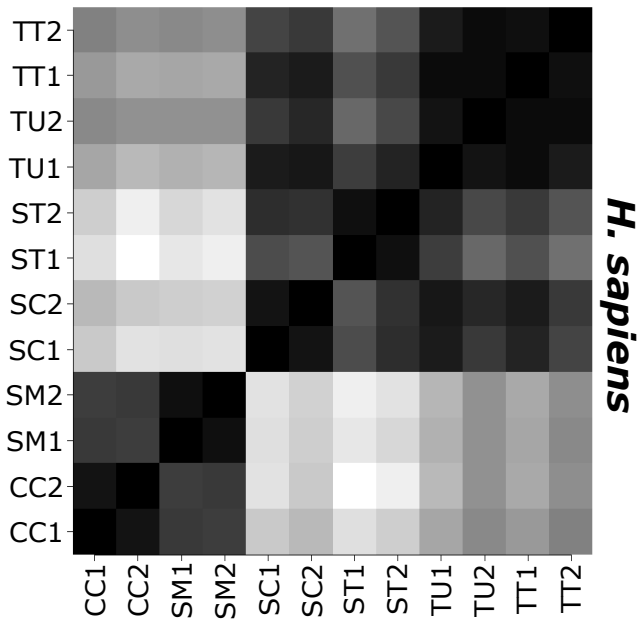

Supplement: pnas_0701883104_2.pdf [file pnas_0701883104_2.pdf]

a

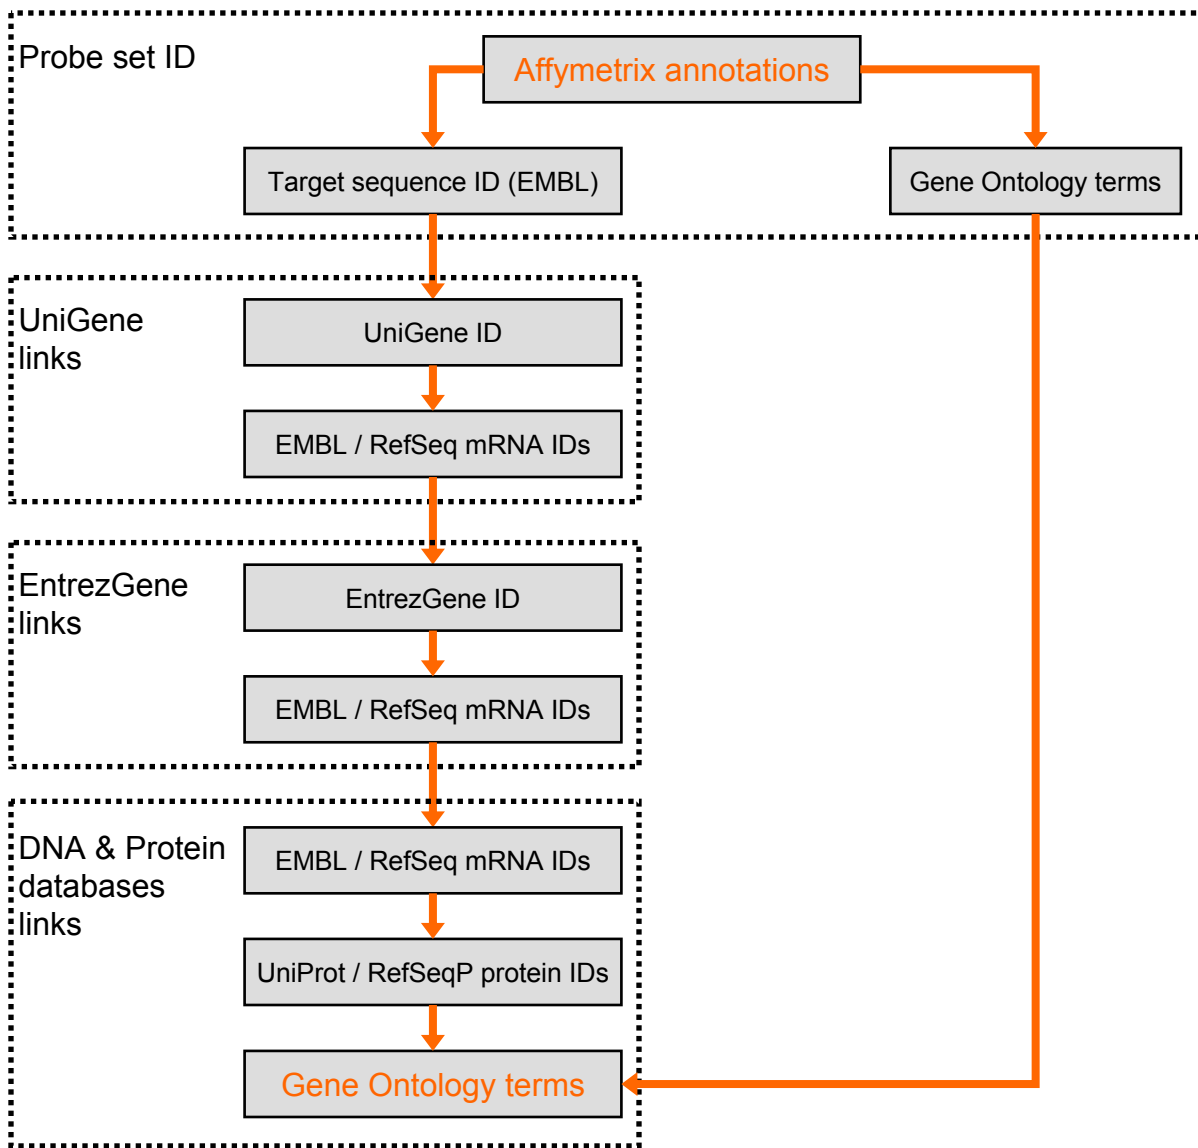

Supplement: pnas_0701883104_3.pdf [file pnas_0701883104_3.pdf]

**b**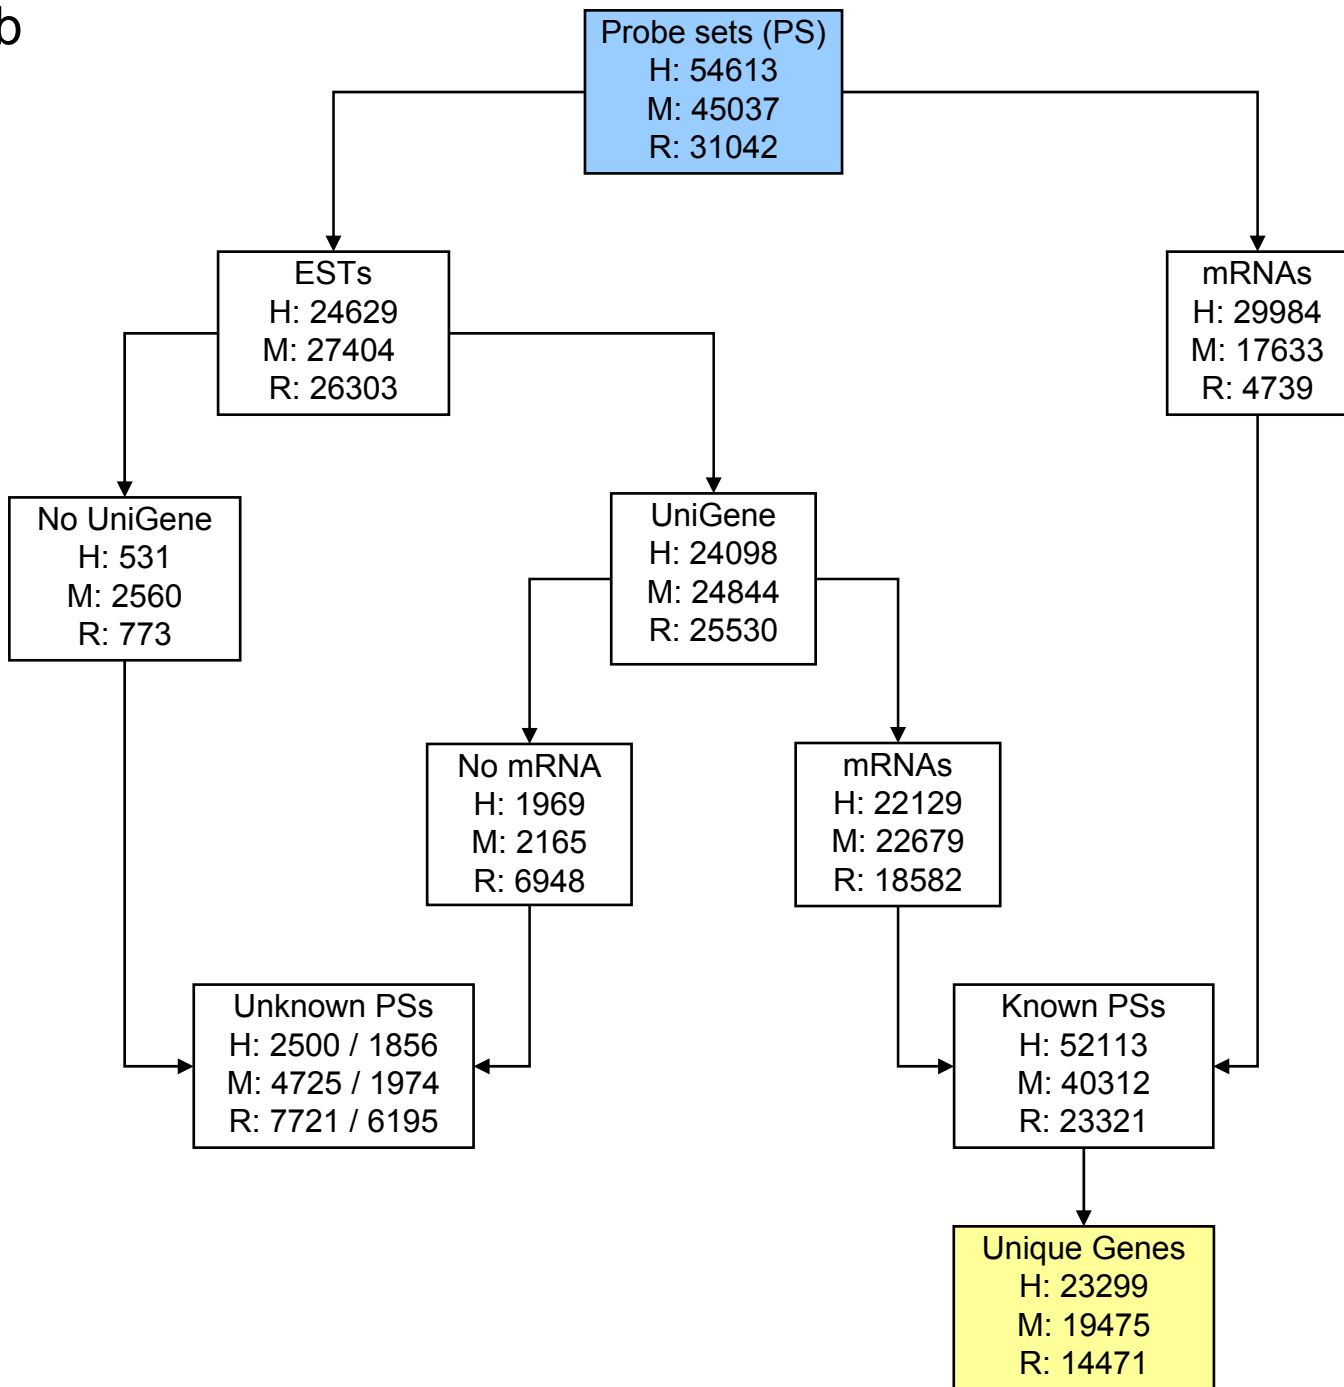

Supplement: pnas_0701883104_4.pdf [file pnas_0701883104_4.pdf]

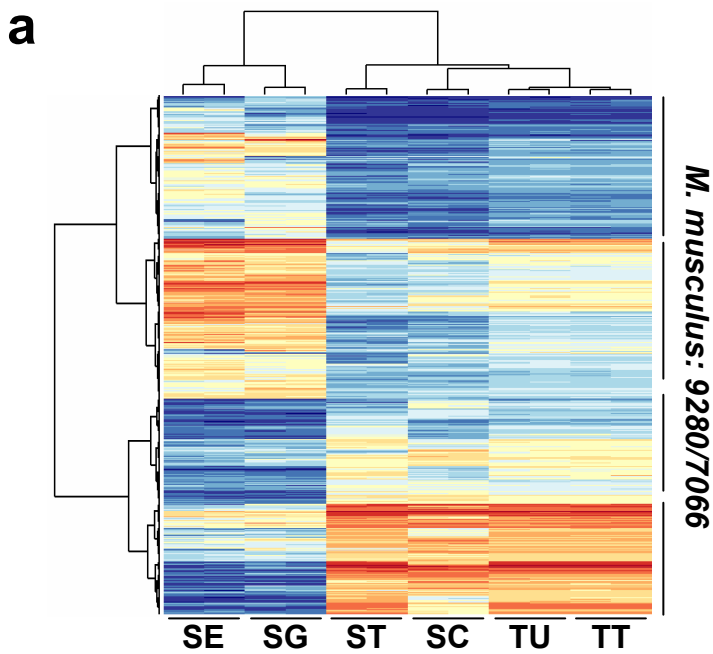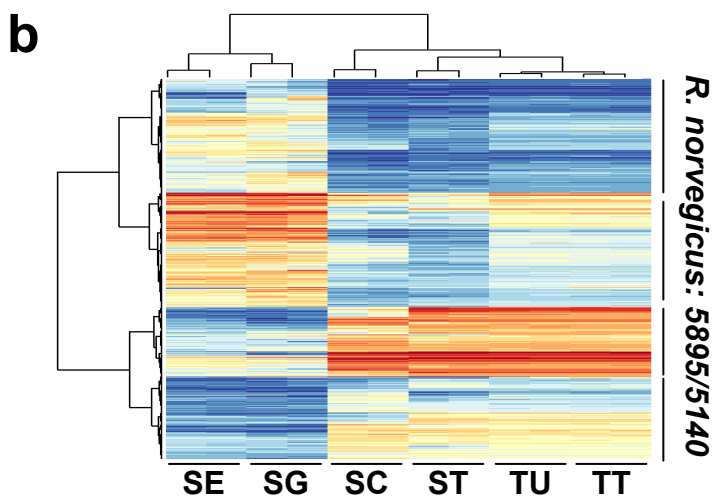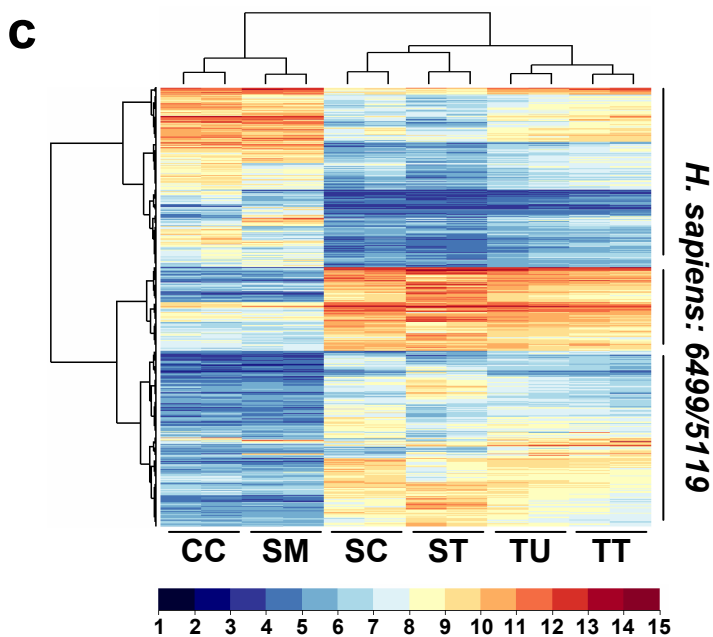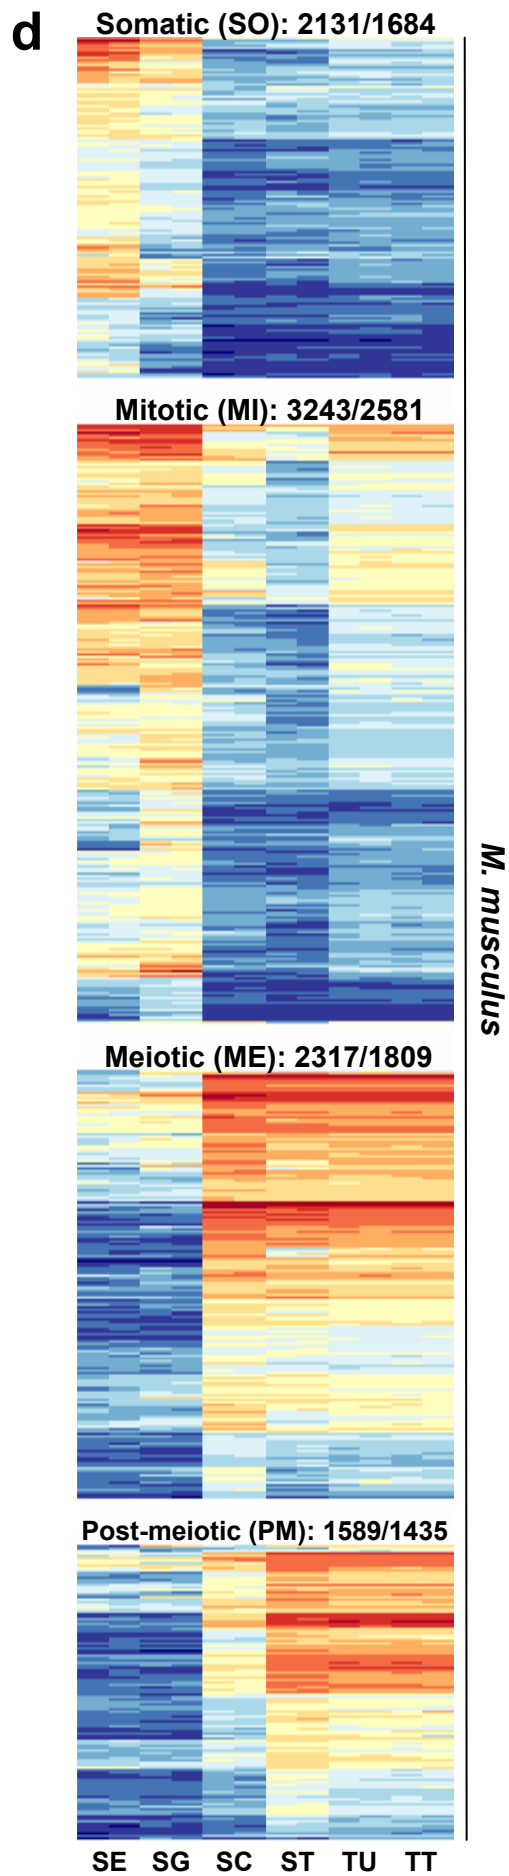

Supplement: pnas_0701883104_5.pdf [file pnas_0701883104_5.pdf]

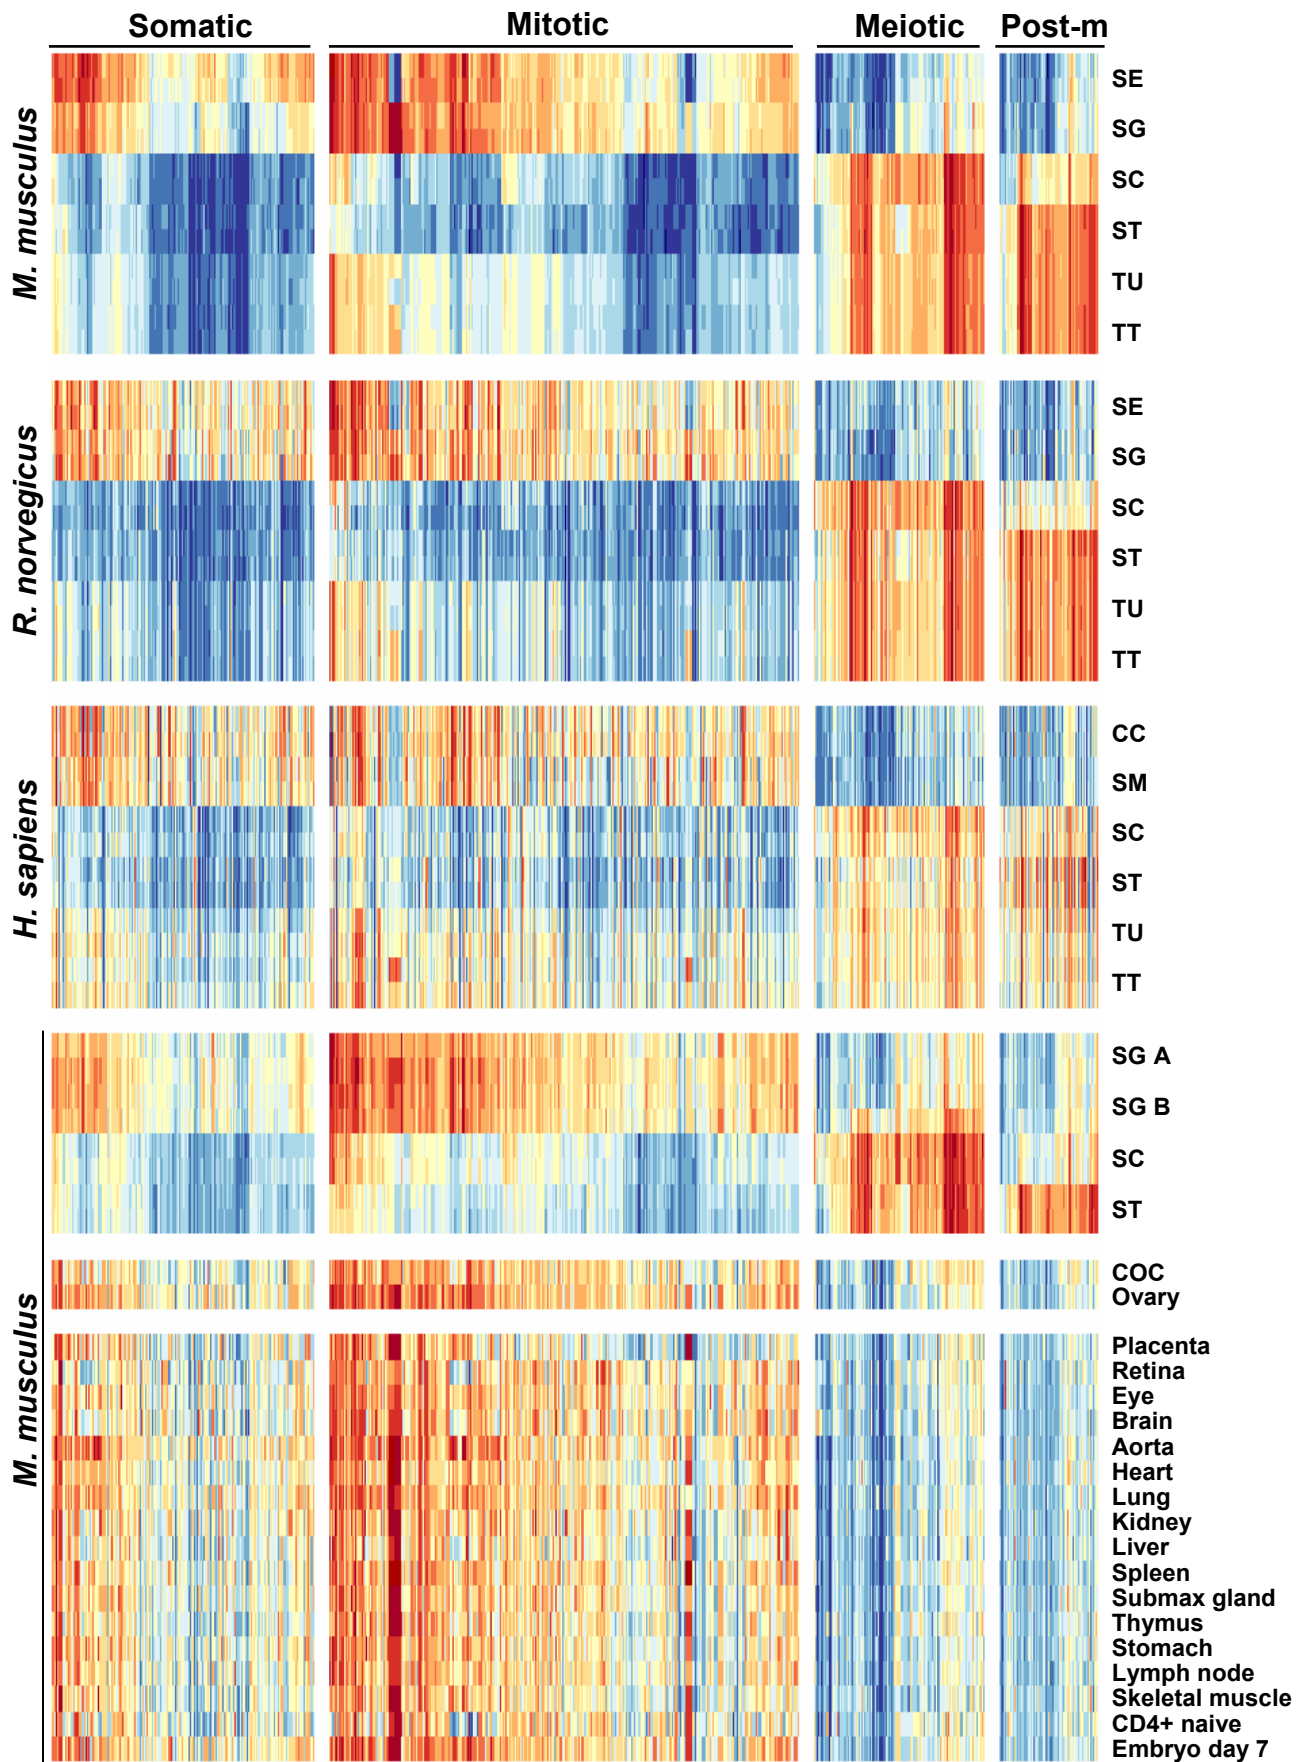

Supplement: pnas_0701883104_6.pdf [file pnas_0701883104_6.pdf]

b

Post-meiotic 37/33

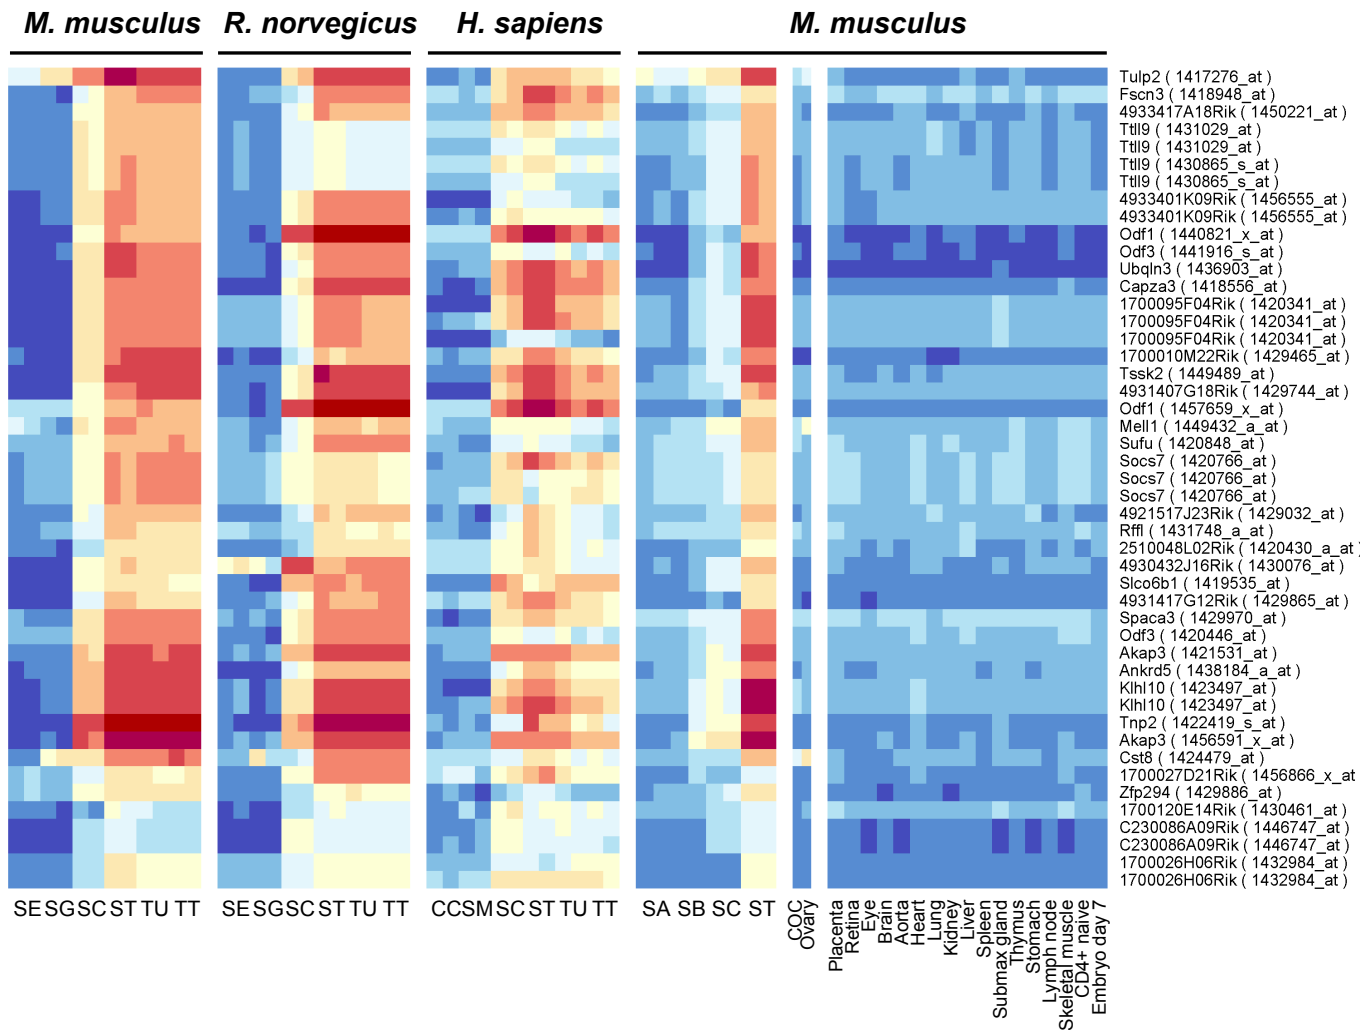

Supplement: pnas_0701883104_8.pdf [file pnas_0701883104_8.pdf]

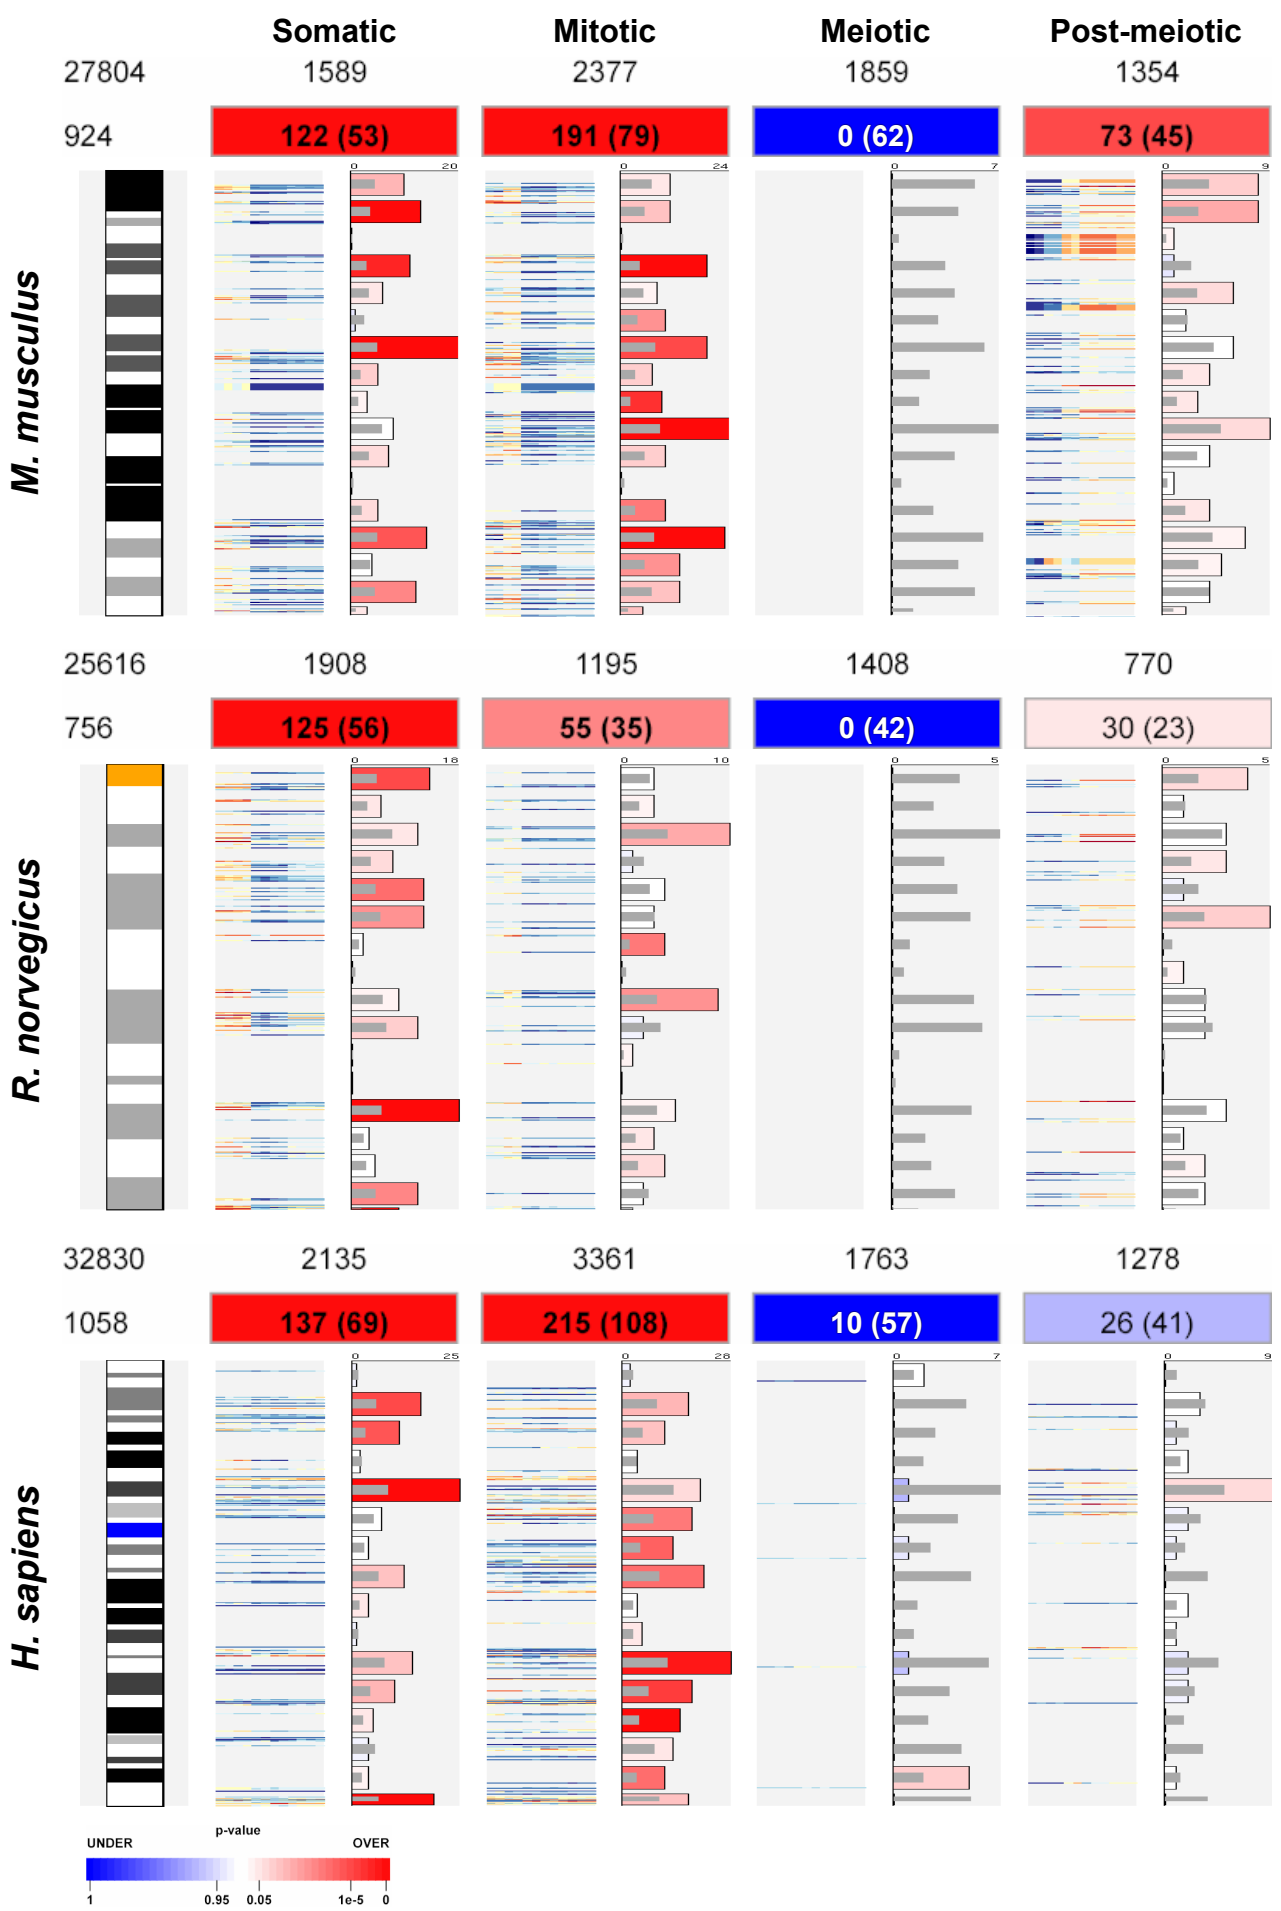

Supplement: pnas_0701883104_9.pdf [file pnas_0701883104_9.pdf]
